# Supplementary material for: In vivo Hox binding specificity revealed by systematic changes to a single cis regulatory module
Source: PubMed Central journal article supplement (PMC6689074; doi:10.1038/s41467-019-11416-1), 2019-08-09
Supplement: 41467_2019_11416_MOESM1_ESM.pdf [file 41467_2019_11416_MOESM1_ESM.pdf]

# **Supplementary Information**

***In vivo* Hox binding specificity revealed  
by systematic changes to a single cis  
regulatory module**

**Carlos Sánchez-Higuera et al.**

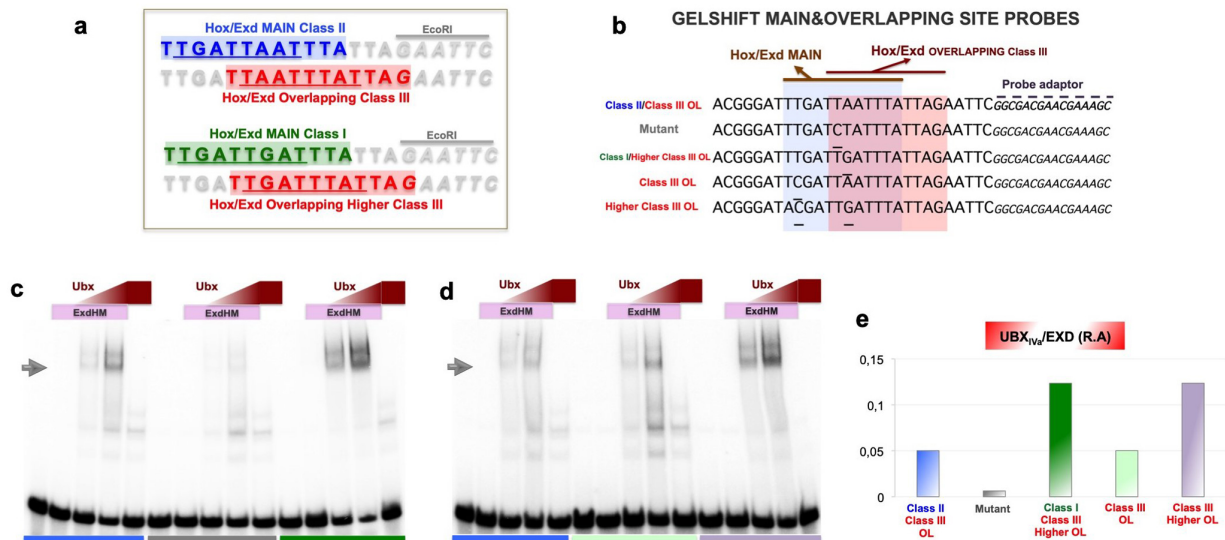

**Supplementary Figure 1: Biochemical and *in silico* predicted site affinity to main and overlapping class 3 sites or to the overlapping site**

(a) Sequence comparison of the oligo containing the *main* and *overlapping* wild type sites with that carrying the class 1 mutated site (green) that secondarily generates a higher affinity class 3 site. (b) oligo probes used to test in EMSA the affinity to probes containing variants for both sites or only containing the *overlapping* site after mutation of the main site. (c) Ubx binding to both the *main* class 2 site and *overlapping* class 3 containing oligo (blue lanes); to a mutant for both sites (grey); to a *main* class 1 site that transformed the *overlapping* site into a High class 3 (green). (d) Ubx binding to both the *main* class 2 site and *overlapping* class 3 containing oligo (blue); to a mutant *main* with a class 3 *overlapping* site (light green); or to a mutant *main* with a high affinity class 3 *overlapping* site (light purple). (e) *In silico* predicted affinity of Ubx to sites shown in (c-d).

Comparison of blue lanes with light green labelled lanes in d shows Ubx binding is maintained or even increased in the absence of the *main* site, indicating Ubx binding to the oligos containing two sites is mostly occurring through the *overlapping* class 3 site. This conclusion is reinforced by the strong binding of Ubx observed in the light purple labelled lanes where only the *overlapping* site remains. These EMSA results indicate that the trunk expression observed in *S1+55cl1* embryos is mediated through the *overlapping* site. Source data are provided as a Source Data file.

a

Dm-Dfd  
Al-Hox4

Sequence alignment table for Dm-Dfd Al-Hox4. Columns include accession numbers (P07548, B8RCB0), gene names (DFD\_DROME, B8RCB0\_BRALA), positions (1-279), and scores (58, 20, 118, 20, 178, 50, 238, 65, 297, 110, 356, 165, 414, 226, 476, 268, 536, 278, 586, 278).

Deformed A-Hox4 YPWM YPWM Consensus YPWM W motif

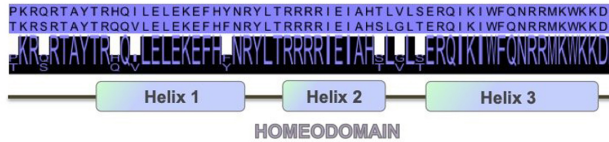

b

Dm-Labial  
Al-Hox4

Sequence alignment table for Dm-Labial Al-Hox4. Columns include accession numbers (B8CA9, P10105), gene names (B8CA9\_BRALA, LAB\_DROME), positions (1-597), and scores (0, 60, 120, 0, 180, 0, 240, 24, 300, 84, 328, 144, 358, 195, 416, 195, 476, 234, 536, 596, 288, 635).

Labial A-Hox4 YKWM YDWM Consensus YKWM W motif

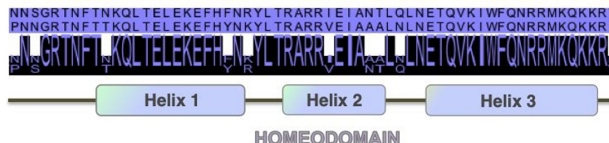

c

Dm-Ubx  
Al-Hox7

Sequence alignment table for Dm-Ubx Al-Hox7. Columns include accession numbers (P83949, B8CB5), gene names (UBX\_DROME, B8CB5\_BRALA), positions (1-212), and scores (60, 12, 113, 64, 173, 93, 233, 111, 288, 151, 348, 211, 389, 236).

Ubx A-Hox7 YPWM YPWM Consensus YPWM W motif

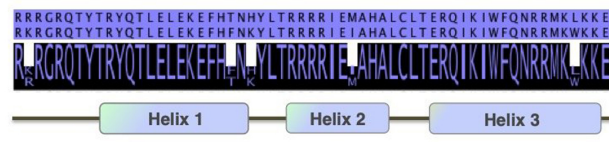

**Supplementary Figure 2: Sequence alignment of *D. melanogaster* and *A. lanceolatus* orthologous proteins**

Full sequence Uniprot alignments of (a) Dfd and AI-Hox4, (b) Lab and AI-Hox1 and (c) Ubx and AI-Hox7. In all cases most conservation maps to the homeodomain especially on the DNA-contacting third helix and on the cofactor interacting hexapeptide motif. Specific alignments of the hexapeptide motif (also known as W motif) and the homeodomain performed with Jalview are shown under the full sequence alignment

Note that the most similar cofactor interacting motives (labelled in orange) between UbxIVa and AI-Hox7 do not align when using either Uniprot or Clustal w software with default settings. UbxIVa contains 4 described W motifs <sup>35</sup>.

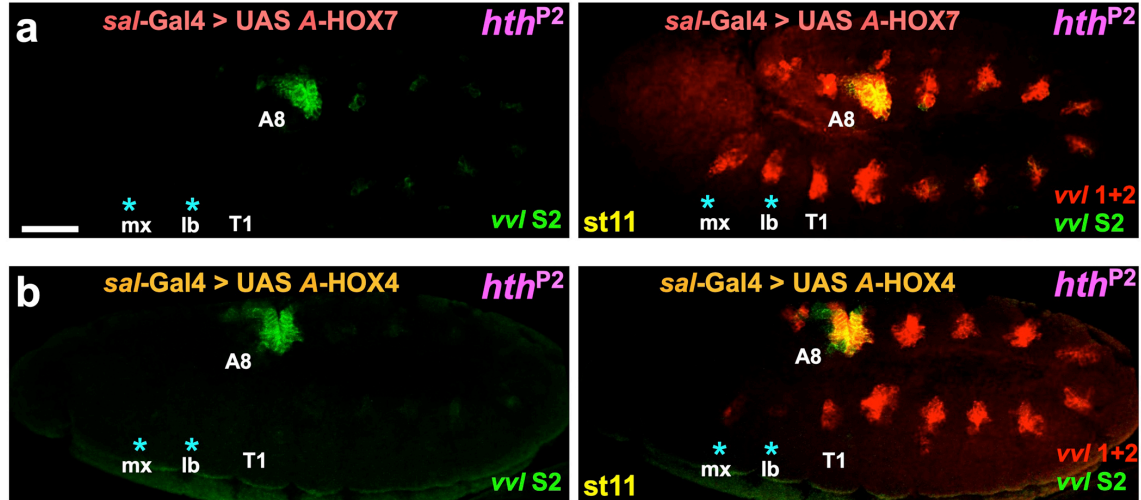

### Supplementary Figure 3: *Amphioxus* Hox monomeric function in *Drosophila*

Expression of *S2-GFP* (a-b) or *vvl1+2-mCherry* (red) and *S2-GFP* (a-b, right panels) in *hth<sup>P2</sup>* mutant embryos that express in the maxilla and labium (asterisks) the *UAS-AHox7* (a) or *UAS-AHox4* (b) with *sal-Gal4*. *AHox-7* can rescue *vvl1+2* but not *S2* expression, while *AHox-4* cannot rescue any of them. We did not test the rescue capacity of *AHox1* in *hth<sup>P2</sup>* embryos as *AHox1* is unable to rescue any of these constructs in a wild type embryo (see Fig. 4I). Scalebar 50 $\mu$ m.

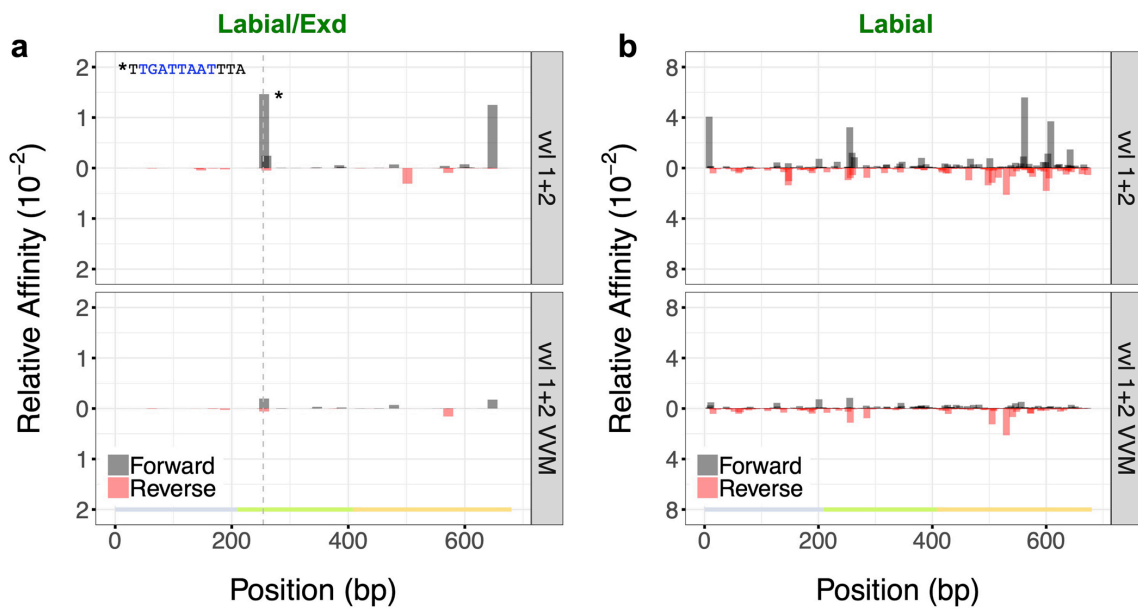

**Supplementary Figure 4: Predicted site affinity of Lab to *vv1+2* and *vv1+2vvm***

NRLB predicted relative affinity of Lab-Exd (a) or of monomer Lab (b) to *vv1+2* or to the remaining Hox binding sites in the *vv1+2vvm*. Asterisk and discontinuous vertical line in (a) label the position of the *main* site.

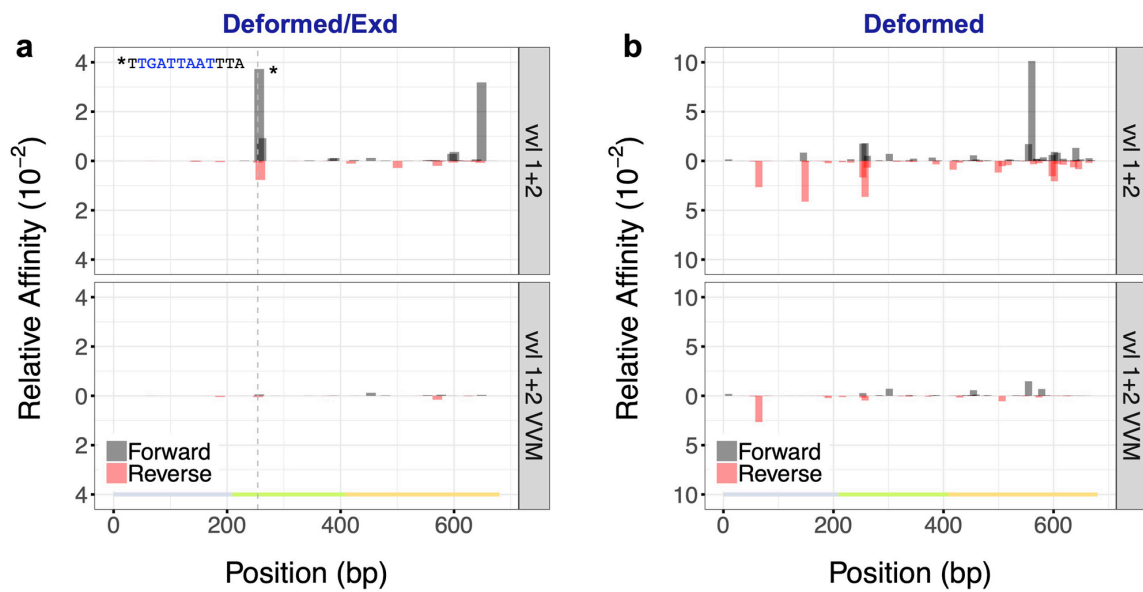

**Supplementary Figure 5: Predicted site affinity of Dfd to *vv1+2* and *vv1+2vvm***

NRLB predicted relative affinity of Dfd-Exd (a) or of monomer Dfd (b) to *vv1+2* or to the remaining Hox binding sites in the *vv1+2vvm*. Asterisk and discontinuous vertical line in (a) label the position of the *main* site.

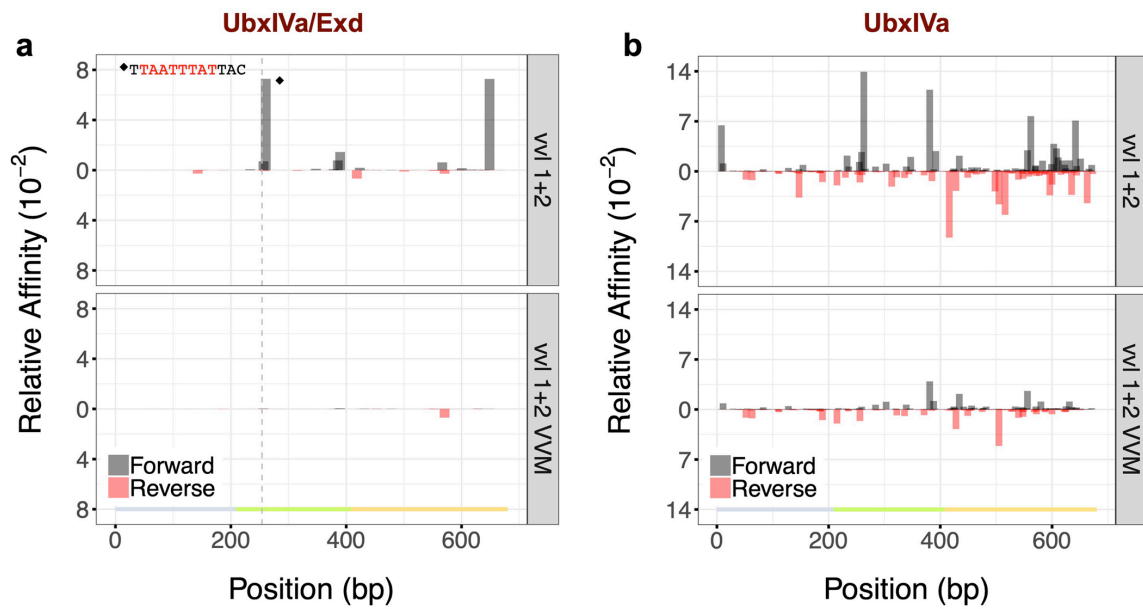

**Supplementary Figure 6: Predicted site affinity of Ubx IVa to *vv1+2* and *vv1+2vvm***

NRLB predicted relative affinity of Ubx IVa-Exd (a) or of monomer Ubx IVa (b) to *vv1+2* or to the remaining Hox binding sites in the *vv1+2vvm*. Diamond and discontinuous vertical line in (a) label the position of the *overlapping* site.



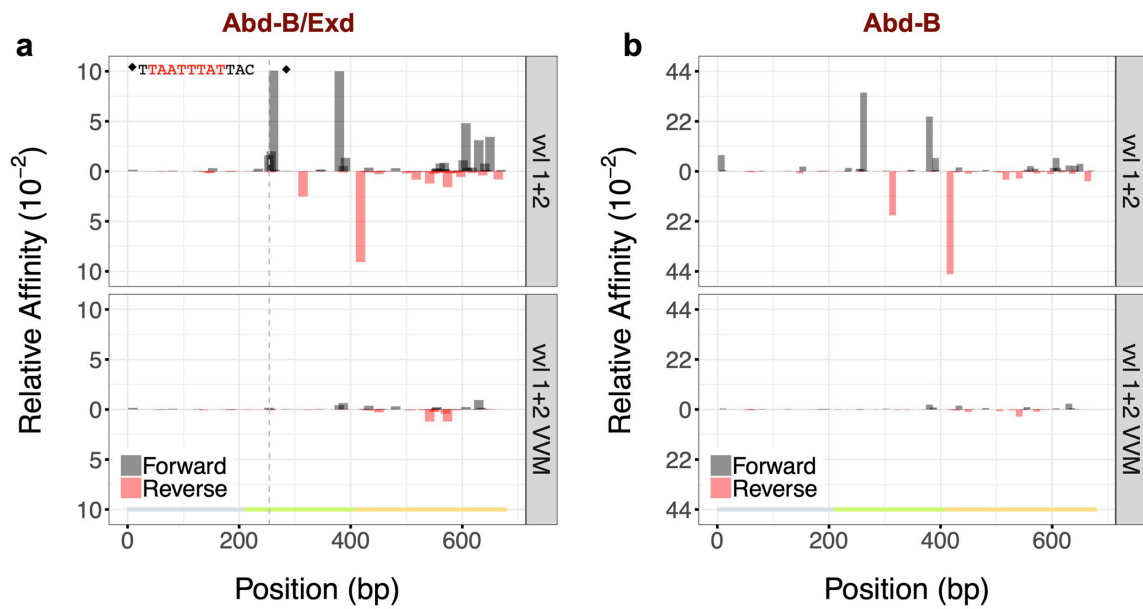

**Supplementary Figure 7: Predicted site affinity of Abd-B to *vl1+2* and *vl1+2vvm***

NRLB predicted relative affinity of AbdB-Exd (a) or of monomer AbdB (b) to *vl1+2* or to the remaining Hox binding sites in the *vl1+2vvm*. Diamond and discontinuous vertical line in (a) label the position of the *overlapping* site.

|                           |                                                                        |     |
|---------------------------|------------------------------------------------------------------------|-----|
| <i>vv1</i> 1+2            | GGTTAATGATGGCCACACAGGCGACAACCTGGCGACTGAGATCTTGTCCCGCAATTTCCCG<br>   ## | 60  |
| <i>vv1</i> 1+2 <i>vvm</i> | GGTTggTGATGGCCACACAGGCGACAACCTGGCGACTGAGATCTTGTCCCGCAATTTCCCG          | 60  |
| <i>vv1</i> 1+2            | ATCATTGCTCAGATACGATACGGATTCTGCGAAGTCACCGGGCAAAGGCATCCCACTGA<br>        | 120 |
| <i>vv1</i> 1+2 <i>vvm</i> | ATCATTGCTCAGATACGATACGGATTCTGCGAAGTCACCGGGCAAAGGCATCCCACTGA            | 120 |
| <i>vv1</i> 1+2            | GTTTGTGGCTTCTTGTCAAACAAATCATTACTGCGGATACTCCTCGATATTCCCTCAAG<br>        | 180 |
| <i>vv1</i> 1+2 <i>vvm</i> | GTTTGTGGCTTCTTGTCAAACAAAgCAgggACTGCGGATACTCCTCGATATTCCCTCAAG           | 180 |
| <i>vv1</i> 1+2            | ATACTATCCATTCTACTGTGTAGGTGTGAGCTGCAATTTCCCTGGAAAAATTACGTCCA<br>        | 240 |
| <i>vv1</i> 1+2 <i>vvm</i> | ATACTATCCATTCTACTGTGTAGGTGTGAGCTGCAATTTCCCTGGAAAAAggACGTCCA            | 240 |
| <i>vv1</i> 1+2            | GCACGGGATTTGATTAATTTATTACCGCTTGTGCAAGGGAAAGTGATCTTCGGGTTCTTA<br>       | 300 |
| <i>vv1</i> 1+2 <i>vvm</i> | GCACGGGATTTGATcAATTTcTTcCCGCTTGTGCAAGGGAAAGTGATCTTCGGGTTCTTA           | 300 |
| <i>vv1</i> 1+2            | ACGGTTGCGGATCGTAAAAACATTCGGCAGACACAATTTGTTGAATTATCTGCGGGCTGC<br>       | 360 |
| <i>vv1</i> 1+2 <i>vvm</i> | ACGGTTGCGGAgCgGgAAAAACATTCGGCAGACACAATTTGTTGAAggATCTGCGGGCTGC          | 360 |
| <i>vv1</i> 1+2            | TGTTGTGGGCACTTTTTATGAGTTATTTATGTGCGACTGTGGCGCAACAGGATCATAA<br>         | 420 |
| <i>vv1</i> 1+2 <i>vvm</i> | TGTTGTGGGCACTTTgTTATGgGTTATgTATGTGCGACTGTGGCGCAACAGGATCATgg            | 420 |
| <i>vv1</i> 1+2            | AATATGTAGTTATGGGTAAATCTGTGAAAAATAAATGTAAGCGTAATCTGGAAAAATTGA<br>       | 480 |
| <i>vv1</i> 1+2 <i>vvm</i> | AATATGTAGTTATGGGTAAATCTGTGAAAAATAAATGTAAGCGTggTCTGGAAAAATTGA           | 480 |
| <i>vv1</i> 1+2            | GTGGCCTAGATTACCACATTAGTCATTTCAAAGAAATTAAGAAACTAAAGTAGAAGT<br>          | 540 |
| <i>vv1</i> 1+2 <i>vvm</i> | GTGGCCTAGATTACCACAggAGTCATTTCAAAGAAAggAAAGAAACTAAAGTAGAAGT             | 540 |
| <i>vv1</i> 1+2            | ATAAAAAATTTAAATTGTAATGATTTAAATATATCAAATAATGCAAATTTAAAAAATTA<br>        | 600 |
| <i>vv1</i> 1+2 <i>vvm</i> | ATAAAAAATTTAAATTGTggTGAgggAAATATATCAAATggTGCAAATTTAAAAAaggA            | 600 |
| <i>vv1</i> 1+2            | ATTTGATTACTGCTTTATTTAAATTTTATTTTCATATTAATATGATTTATCGTGCATACG<br>       | 660 |
| <i>vv1</i> 1+2 <i>vvm</i> | ATTTGAggACTGCTTTAggAAAATTTTATTTTCATAggAATATGAgggATCGTGCATACG           | 660 |
| <i>vv1</i> 1+2            | GAAATTAACCTGGATTATGG 680<br>   ##                                      | 680 |
| <i>vv1</i> 1+2 <i>vvm</i> | GAAAggAAACTGGAggATGG 680                                               | 680 |

S1: [1 → 209]

S2: [210 → 418]

S3: [419 → 680]

*vv1* 1+2 genomic location: (Chr3L: 6,764,714-6,765,393)

## Supplementary Figure 8: Aligned *vv1*+2 and *vv1*+2*vvm* sequences

The *vv1*+2 sequence aligned to the *vv1*+2*vvm* sequence indicating the mutated sites. The S1 sequence is shown in grey, S2 in green and S3 in brown. Genomic location coordinates for the *vv1*+2 enhancer are included.

| REPORTER GENE                      | Intercalary Segment (ic) | Maxillary Segment (mx) | Labial Segment (lb) | Trunk Segments (T2-A7) | Eighth Abdominal Segment (A8) | MAIN&OL Hox/Exd sites     | Global Hox Monomer Input per fragment |
|------------------------------------|--------------------------|------------------------|---------------------|------------------------|-------------------------------|---------------------------|---------------------------------------|
| vv/ 1+2                            | ☒                        | ✓✓✓✓                   | ✓✓✓✓                | ✓✓✓✓                   | ✓✓✓✓                          | Main cl2<br>OL cl3        | high                                  |
| vv/ S1+S2                          | ☒                        | ✓✓✓✓                   | ✓✓✓✓                | ✓✓✓✓                   | ✓✓✓✓                          | Main cl2<br>OL cl3        | high                                  |
| vv/ S2                             | ☒                        | ✓✓✓                    | ☒                   | ✓✓✓✓                   | ✓✓✓✓                          | Main cl2<br>OL cl3        | high                                  |
| vv/ S1+55                          | ☒                        | ✓✓                     | ✓✓✓                 | ☒                      | ☒                             | Main cl2<br>OL cl3        | weak                                  |
| vv/ S1+55 cl1                      | ✓✓                       | ✓✓✓                    | ✓✓✓✓                | ✓                      | ☒                             | Main cl1<br>Higher OL cl3 | weak                                  |
| vv/ S1+55 cl3                      | ☒                        | ✓                      | ✓✓✓                 | ✓                      | ✓                             | Main cl3                  | weak                                  |
| vv/ S1+55 cl1OF                    | ✓✓✓✓                     | ✓✓✓                    | ✓✓✓                 | ☒                      | ☒                             | Main cl1OF                | weak                                  |
| vv/ S1+55 cl2OF                    | ☒                        | ✓✓✓✓                   | ✓✓✓✓                | ☒                      | ☒                             | Main cl2OF                | weak                                  |
| vv/ S1+55 cl3OF                    | ☒                        | ✓✓✓                    | ✓✓✓                 | ✓✓                     | ✓✓✓                           | Main cl3OF                | weak                                  |
| vv/ S1+55 mut                      | ☒                        | ☒                      | ☒                   | ☒                      | ☒                             | none                      | weak                                  |
| vv/ 1+2 <sup>Main&amp;OL mut</sup> | ☒                        | ✓                      | ✓                   | ✓✓✓                    | ✓✓✓✓                          | none                      | high                                  |
| vv/ S2 <sup>Main&amp;OL mut</sup>  | ☒                        | ☒                      | ☒                   | ☒                      | ✓✓✓✓                          | none                      | high                                  |
| vv/ 1+2 vvm                        | ☒                        | ☒                      | ☒                   | ☒                      | ☒                             | none                      | weak                                  |
| vv/ 1+2 vvm-R                      | ☒                        | ✓✓✓                    | ✓✓✓                 | ✓✓✓✓                   | ✓✓✓✓                          | Main cl2<br>OL cl3        | weak                                  |
| vv/ S1                             | ☒                        | ☒                      | ☒                   | ☒                      | ☒                             | none                      | weak                                  |
| vv/ S3                             | ☒                        | ☒                      | ☒                   | ☒                      | ☒                             | none                      | high                                  |

  
 Highest optimal expression

  
 High expression

  
 Medium expression

  
 Low Expression

  
 Occasional not significant expression

### Supplementary Table 1: Summary of the segmental expression in different reporter genes

At a glance summary of the expression driven by the different reporters. The levels of expression in each segment are indicated using a subjective five degree scale: occasional not significant expression; low expression; medium expression; high expression; highest optimal expression.

The presence or absence of the *main* and *overlapping* sites and the binding class to which they belong, plus the abundance of monomer sites in each reporter are indicated in the last two columns.

EMSA gel Figure 3i

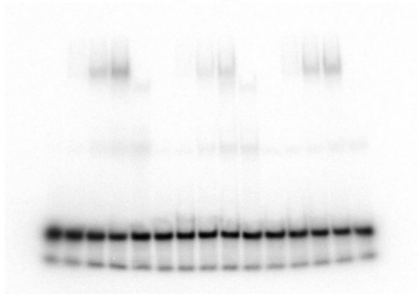

EMSA gel Figure 3j

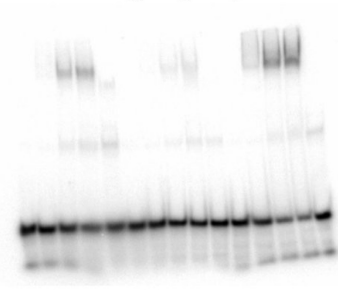

EMSA gel Figure 3l

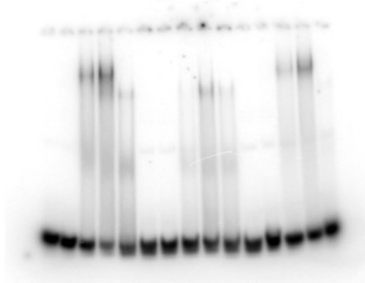

EMSA gel Figure 3m

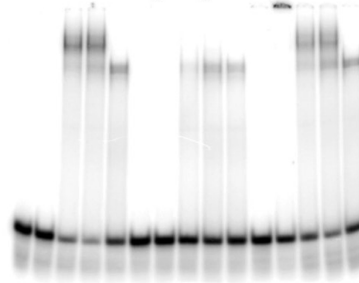

EMSA gel Figure 3o

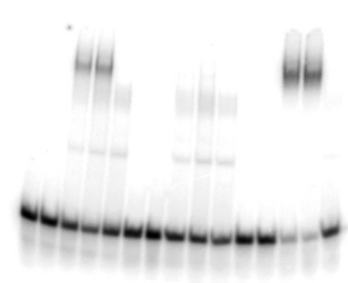

EMSA gel Figure 3p

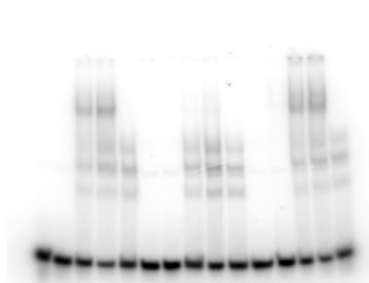

EMSA gel Figure 3r

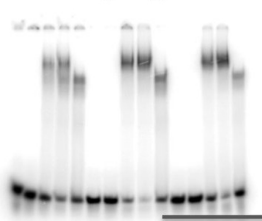

unrelated experiment

EMSA gel Figure 3t

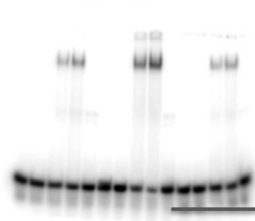

unrelated experiment

EMSA gel Figure 3v

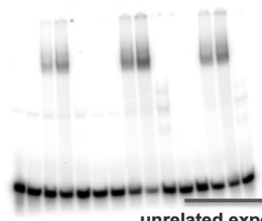

unrelated experiment

EMSA gel Supplementary Figure1c

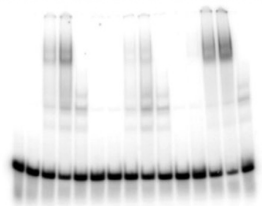

EMSA gel Supplementary Figure1d

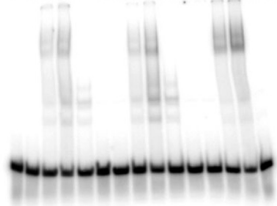

Unprocessed scans of EMSA experiments

## Primer List

### vv/ S1+55

**Forward vv/ S1 EcoRI:**

5'-AAAGAATTCGGTTAATGATGGCCACACAGGCGAC-3'

**Rvs vv/ S1+55 EcoRI:**

5'-AAAGAATTCTAATAAATTAATCAAATCCCGTGCTGGACGTAA-3'

---

### vv/ S1+55 CI1

**Forward vv/ S1 EcoRI:**

5'-AAAGAATTCGGTTAATGATGGCCACACAGGCGAC-3'

**Reverse vv/ S1+55 CI1 EcoRI:**

5'-AAAGAATTCTAATAAATCAATCAAATCCCGTGCTGGACGTAA-3'

---

### vv/ S1+55 CI3

**Forward vv/ S1 EcoRI:**

5'-AAAGAATTCGGTTAATGATGGCCACACAGGCGAC-3'

**Reverse vv/ S1+55 CI3 EcoRI:**

5'-AAAGAATTCTAATAAATAAATCAAATCCCGTGCTGGACGTAA-3'

---

### vv/ S1+55 CI1 OF

**Forward vv/ S1 EcoRI:**

5'-AAAGAATTCGGTTAATGATGGCCACACAGGCGAC-3'

**Reverse vv/ S1+55 CI1 OF EcoRI:**

5'-AAAGAATTCTAAGTAATCAATCATATCCCGTGCTGGACGTAA-3'

---

### vv/ S1+55 CI2 OF

**Forward vv/ S1 EcoRI:**

5'-AAAGAATTCGGTTAATGATGGCCACACAGGCGAC-3'

**Reverse S1+55 CI2 OF:**

5'- AAAGAATTCTAAGTCATTAATCATATCCCGTGCTGGACGTAA-3'

---

### vv/ S1+55 CI3 OF

**Forward vv/ S1 EcoRI:**

5'-AAAGAATTCGGTTAATGATGGCCACACAGGCGAC-3'

**Reverse vv/ S1+55 Cl3 OF EcoRI:**

5'-AAAGAATTCTAAGTCATAAATCATATCCCGTGCTGGACGTAA-3'

---

**vv/ S1+55 mutant**

**Forward vv/ S1 EcoRI:**

5'-AAAGAATTCGGTTAATGATGGCCACACAGGCGAC-3'

**Reverse vv/ S1+55 mutant EcoRI:**

5'-AAAGAATTCTAATAAATTGATCAAATCCCGTGCTGGACGTAA-3'

---

**vv/ S2**

**Forward vv/ S2 EcoRI :**

5':AAAGAATTCGCTGCAATTTTCCCTGGAAAAATTACGTCCAGCACGGGATTTGATTAATTTATTA-3'

**Rvs S2 EcoRI:**

5'-AAAGAATTCATGATCCTGTTGGCGCCACAGTCGCACAT-3'

---

**vv/ S2 MAIN&OL mutant**

**Forward vv/ S2 Main&OL mut EcoRI:**

5'-AAAGAATTCGCTGCAATTTTCCCTGGAAAAATTACGTCCAGCACGGGATTTGATCAATTTATTA-3'

**Rvs S2 EcoRI:**

5'-AAAGAATTCATGATCCTGTTGGCGCCACAGTCGCACAT-3'

---

**vv/ S1+S2**

**Forward vv/ S1 EcoRI:**

5'-AAAGAATTCGGTTAATGATGGCCACACAGGCGAC-3'

**Rvs S2 EcoRI:**

5'-AAAGAATTCATGATCCTGTTGGCGCCACAGTCGCACAT-3'

---

**vv/ 1+2 MAIN&OL mutant\***

**External Forward vv/ S1 EcoRI:**

5'-AAAGAATTCGGTTAATGATGGCCACACAGGCGAC-3'

**External Reverse vv/ S3 EcoRI:**

5'-AAAGAATTCATATAATCCAGTTTAATTTCCGTATGCACGATAAA-3'

**Forward vv/ S2 Main&OL mutant:**

5'- GATCAATTTCTTCCCGCTTGTCTCGAAGGGAAAGTG-3'

**Reverse vv/ S2 Main&OL mutant:**

5'-CCTTCGACAAGCGGGAAGAAATTGATCAAATCCCGTGCTGG-3'

**\* PCR mutagenesis in two steps (First Round PCRs and Second Round of Overlapping PCRs).**

---

### **vv/ 1+2 vvm-R\***

**External Forward vv/ S1 vvm EcoRI:**

5'-AAAGAATTCGGTTGGTGATGGCCACACAGGCGACAA-3'

**External Reverse vv/ S3 vvm EcoRI:**

5'-AAAGAATTCATCCTCCAGTTTCCTTTCCGTATGCAC-3'

**Fwd vv/ S2 Main&OL restored:**

5'-AGCACGGGATTTGATTAATTTATTACCGCTTGTC-3'

**Rvs vv/ S2 Main&OL restored:**

5'-GACAAGCGGTAATAAATTAATCAAATCCCGTGCT-3'

**\* PCR mutagenesis in two steps (First Round PCRs and Second Round of Overlapping PCRs)**
